# Supplementary material for: Using theoretical calculations to predict the redox potential of mononuclear manganese complexes
Source: Royal Society of Chemistry journal article supplement (doi:10.1039/c8nj03254h), 2018-01-01
Supplement: c8nj03254h1.pdf [file c8nj03254h1.pdf]

Electronic Supplementary Material (ESI) for New Journal of Chemistry.

This journal is © The Royal Society of Chemistry and the Centre National de la Recherche Scientifique 2018

## Electronic Supplementary Information

### Using theoretical calculations to predict the redox potential of mononuclear manganese complexes

Juan L. Puzzolo,<sup>a</sup> Salvador I. Drusin,<sup>b,c</sup> Verónica A. Daier,<sup>a,d</sup> Sandra Signorella,<sup>a,d</sup> Diego M. Moreno,<sup>a,d\*</sup>

<sup>a</sup>. Instituto de Química Rosario (IQUIR, CONICET-UNR), Suipacha 570, S2002LRK Rosario, Santa Fe, Argentina.

<sup>b</sup>. Instituto de Biología Molecular y Celular de Rosario (IBR, CONICET-UNR), Ocampo y Esmeralda, predio CCT, 2000 Rosario, Argentina.

<sup>c</sup>. Área Física, Facultad de Ciencias Bioquímicas y Farmacéuticas, Universidad Nacional de Rosario, S2002LRK Rosario, Argentina.

<sup>d</sup>. Área Química General e Inorgánica, Facultad de Ciencias Bioquímicas y Farmacéuticas, Universidad Nacional de Rosario, S2002LRK Rosario, Argentina.

e-mail: [moreno@iquir-conicet.gov.ar](mailto:moreno@iquir-conicet.gov.ar) (D.M.M)

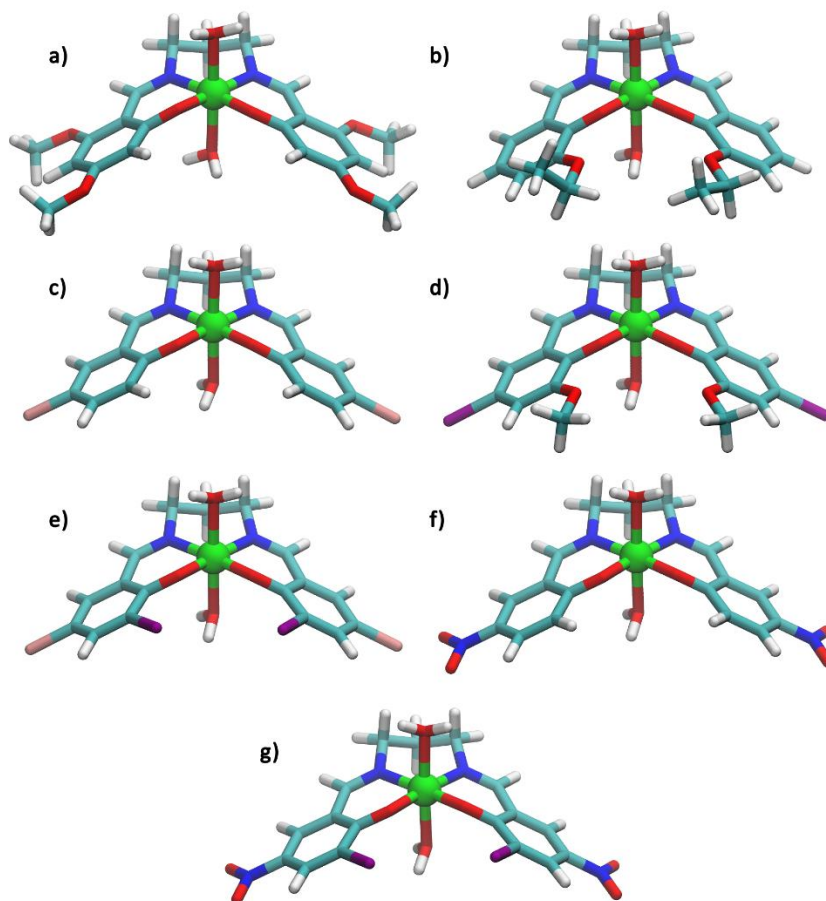

**Fig. S1** Optimized structure of the all complexes. A) Complex-1 B) Complex-2. Atoms are represented with the following colours: H: white, C: cyan, N: blue, O: red, Mn: green, Br: purple.

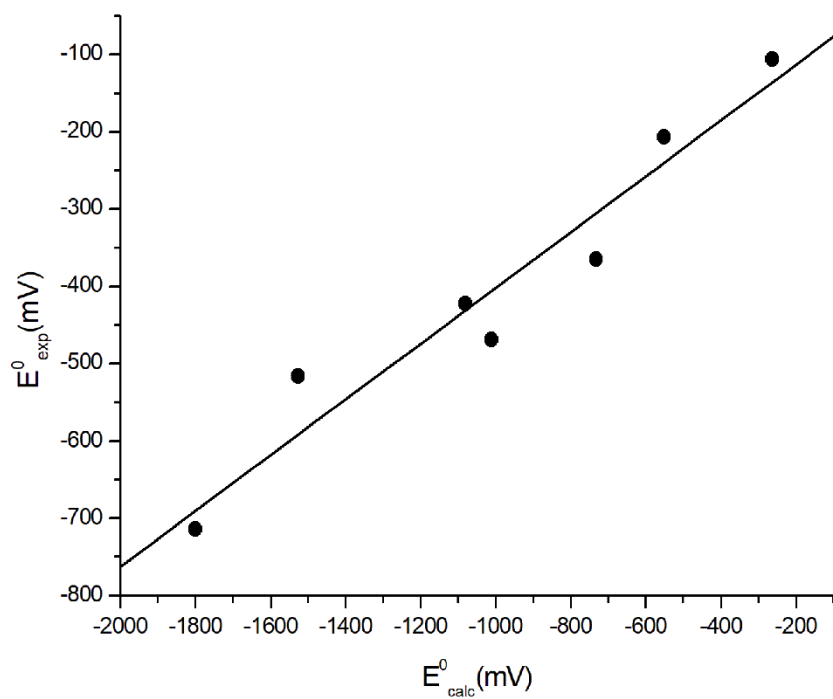

**Fig. S2** Plot of calculated and experimental redox potentials for the manganese complexes. Calculations were performed at B3LYP/6-31G\*\*/LANL2DZ in vacuum. Solid line represents the linear regression of the data. Regression coefficient (R) is 0.96.

**Table SI** Relevant geometrical parameters of the optimized structures of the Mn<sup>III</sup> complexes calculated at B3LYP / 6-31G\*\* / LANL2DZ / PCM

|          | Complex-1 | Complex-2 | Complex-3 | Complex-4 | Complex-5 | Complex-6 | Complex-7 |
|----------|-----------|-----------|-----------|-----------|-----------|-----------|-----------|
| Mn-O1    | 1.89      | 1.88      | 1.88      | 1.88      | 1.879     | 1.88      | 1.89      |
| Mn-O2    | 1.88      | 1.87      | 1.87      | 1.87      | 1.875     | 1.87      | 1.89      |
| Mn-O3    | 2.31      | 2.30      | 2.29      | 2.29      | 2.292     | 2.30      | 2.26      |
| Mn-O4    | 2.036     | 2.34      | 2.33      | 2.33      | 2.332     | 2.36      | 2.30      |
| Mn-N1    | 2.02      | 2.04      | 2.05      | 2.05      | 2.049     | 2.04      | 2.04      |
| Mn-N2    | 2.03      | 2.05      | 2.05      | 2.05      | 2.054     | 2.05      | 2.04      |
|          |           |           |           |           |           |           |           |
| O1-Mn-O2 | 89.2      | 89.6      | 89.1      | 89.4      | 89.4      | 89.3      | 88.8      |
| O1-Mn-O3 | 89.1      | 91.7      | 94.0      | 92.4      | 92.4      | 88.0      | 95.0      |
| O1-Mn-O4 | 91.1      | 91.6      | 91.3      | 92.0      | 92.0      | 90.7      | 90.4      |
| O1-Mn-N1 | 177.4     | 178.2     | 177.1     | 178.0     | 178.0     | 177.8     | 175.7     |
| O1-Mn-N2 | 88.3      | 88.3      | 88.6      | 88.3      | 88.3      | 88.3      | 88.7      |
| O2-Mn-O3 | 94.4      | 94.2      | 93.6      | 94.1      | 94.1      | 92.2      | 92.2      |
| O2-Mn-O4 | 87.2      | 88.2      | 89.0      | 88.6      | 88.6      | 85.7      | 89.0      |
| O2-Mn-N1 | 89.03     | 88.7      | 88.7      | 88.7      | 88.7      | 89.0      | 88.4      |
| O2-Mn-N2 | 175.0     | 176.7     | 177.4     | 176.6     | 176.7     | 175.4     | 177.6     |
| N1-Mn-O3 | 89.1      | 88.0      | 88.0      | 88.1      | 88.2      | 90.6      | 88.4      |
| N1-Mn-O4 | 90.6      | 88.8      | 86.8      | 87.5      | 87.5      | 90.6      | 86.3      |
| N1-Mn-N2 | 93.6      | 93.4      | 93.5      | 93.6      | 93.6      | 93.4      | 94.0      |
| N2-Mn-O3 | 89.9      | 88.5      | 87.7      | 88.2      | 88.2      | 91.7      | 88.1      |
| N2-Mn-O4 | 88.4      | 89.2      | 89.9      | 89.2      | 89.2      | 90.3      | 90.9      |
| O3-Mn-O4 | 178.3     | 175.9     | 174.1     | 174.7     | 174.7     | 90.3      | 174.5     |

**Table SII** Relevant geometrical parameters of the optimized structures of the Mn<sup>III</sup> complexes calculated at B3LYP / 6-31G\*\* / LANL2DZ / SMD

|          | Complex-1 | Complex-2 | Complex-3 | Complex-4 | Complex-5 | Complex-6 | Complex-7 |
|----------|-----------|-----------|-----------|-----------|-----------|-----------|-----------|
| Mn-O1    | 1.89      | 1.88      | 1.88      | 1.88      | 1.89      | 1.89      | 1.90      |
| Mn-O2    | 1.88      | 1.87      | 1.88      | 1.88      | 1.88      | 1.89      | 1.89      |
| Mn-O3    | 2.32      | 2.31      | 2.31      | 2.30      | 2.30      | 2.29      | 2.27      |
| Mn-O4    | 2.37      | 2.35      | 2.35      | 2.34      | 2.33      | 2.33      | 2.32      |
| Mn-N1    | 2.02      | 2.04      | 2.05      | 2.04      | 2.04      | 2.04      | 2.04      |
| Mn-N2    | 2.03      | 2.05      | 2.05      | 2.05      | 2.05      | 2.05      | 2.04      |
|          |           |           |           |           |           |           |           |
| O1-Mn-O2 | 89.3      | 89.7      | 89.1      | 89.6      | 90.0      | 88.4      | 89.1      |
| O1-Mn-O3 | 88.1      | 88.3      | 91.9      | 89.2      | 90.1      | 91.8      | 92.9      |
| O1-Mn-O4 | 90.7      | 91.9      | 91.0      | 92.0      | 91.8      | 90.9      | 96.4      |
| O1-Mn-N1 | 177.4     | 177.3     | 177.5     | 177.9     | 178.5     | 177.0     | 176.0     |
| O1-Mn-N2 | 88.2      | 88.1      | 88.5      | 88.1      | 88.2      | 88.6      | 88.5      |
| O2-Mn-O3 | 93.2      | 93.9      | 92.4      | 93.3      | 92.9      | 93.0      | 90.5      |
| O2-Mn-O4 | 87.3      | 87.3      | 89.3      | 88.0      | 88.1      | 88.3      | 89.0      |
| O2-Mn-N1 | 88.9      | 88.7      | 88.8      | 88.8      | 88.5      | 88.9      | 88.5      |
| O2-Mn-N2 | 174.8     | 175.0     | 177.0     | 175.3     | 176.2     | 176.0     | 177.6     |
| N1-Mn-O3 | 90.0      | 89.5      | 89.4      | 89.6      | 89.7      | 89.6      | 90.3      |
| N1-Mn-O4 | 91.1      | 90.2      | 87.7      | 89.1      | 88.4      | 87.7      | 86.9      |
| N1-Mn-N2 | 93.7      | 93.6      | 93.6      | 93.7      | 93.3      | 93.9      | 93.8      |
| N2-Mn-O3 | 91.2      | 90.5      | 89.5      | 90.1      | 90.4      | 89.7      | 89.9      |
| N2-Mn-O4 | 88.1      | 88.2      | 88.9      | 88.0      | 88.6      | 89.1      | 90.1      |
| O3-Mn-O4 | 178.7     | 178.7     | 176.6     | 177.7     | 177.8     | 89.1      | 177.2     |
